# Supplementary material for: Time course and predictive factors for lung volume reduction following stereotactic ablative radiotherapy (SABR) of lung tumors
Source: Springer Nature journal article supplement (doi:10.1186/s13014-016-0616-8), 2016-03-15
Supplement: MOESM1 [file 9774236]

| <b>Variable tested for interaction with V<sub>60BED3</sub> using multivariable linear regression</b> | <b>Sample number</b> | <b>Interaction term coefficient</b> | <b>Coefficient 95% Confidence Interval</b> | <b>R<sup>2</sup> value</b> | <b>Multivariable linear regression interaction term p-value</b> |
|------------------------------------------------------------------------------------------------------|----------------------|-------------------------------------|--------------------------------------------|----------------------------|-----------------------------------------------------------------|
| Pretreatment FEV1%                                                                                   | 64                   | 0.0005                              | -0.01-0.07                                 | 0.55                       | 0.92                                                            |
| Fractions (single vs. multiple)                                                                      | 70                   | 0.14                                | -0.4-0.66                                  | 0.52                       | 0.61                                                            |
| Location (upper vs. lower)                                                                           | 70                   | 0.0004                              | -0.37-0.37                                 | 0.52                       | 0.91                                                            |
| Proximity (central vs. peripheral)                                                                   | 70                   | 0.1                                 | -0.28-0.48                                 | 0.52                       | 0.6                                                             |
| Follow-up time                                                                                       | 70                   | -0.01                               | -0.06-0.04                                 | 0.53                       | 0.69                                                            |
| Treated lobe volume<-910 HU                                                                          | 70                   | 0.0002                              | -0.009-0.009                               | 0.52                       | 0.97                                                            |
| Age                                                                                                  | 70                   | -0.02                               | -0.04-0.001                                | 0.54                       | 0.06                                                            |
| Pretreatment WBC count                                                                               | 65                   | 0.05                                | -0.03-0.12                                 | 0.52                       | 0.2                                                             |
| Pretreatment absolute neutrophil count                                                               | 58                   | 0.08                                | -0.02-0.18                                 | 0.49                       | 0.1                                                             |
| Pretreatment neutrophil-lymphocyte ratio                                                             | 58                   | 0.09                                | -0.05-0.23                                 | 0.48                       | 0.21                                                            |
| V <sub>20BED3</sub> -PTV ratio                                                                       | 70                   | -0.0001                             | -0.0005-0.0003                             | 0.52                       | 0.54                                                            |
| V <sub>20BED3</sub> Shell (subtracting V <sub>40BED3</sub> )                                         | 70                   | -0.08                               | -0.2-0.04                                  | 0.54                       | 0.2                                                             |
| Mean SUV TLV                                                                                         | 69                   | -0.77                               | -1.71-0.17                                 | 0.53                       | 0.11                                                            |
| TLV SUV85                                                                                            | 69                   | -0.5                                | -1.16-0.16                                 | 0.53                       | 0.14                                                            |

---

|                                   |    |       |            |      |      |
|-----------------------------------|----|-------|------------|------|------|
| TLV SUV90                         | 69 | -0.4  | -1.0-0.20  | 0.53 | 0.18 |
| TLV SUV95                         | 69 | -0.28 | -0.8-0.22  | 0.52 | 0.27 |
| Mean SUV Ipsilateral lung         | 69 | -0.7  | -1.57-0.18 | 0.53 | 0.12 |
| Mean SUV Treated lobe             | 69 | -0.54 | -1.32-0.23 | 0.53 | 0.17 |
| Maximum SUV GTV                   | 69 | 0.002 | -0.03-0.03 | 0.51 | 0.9  |
| CyberKnife vs<br>Trilogy/TrueBeam | 70 | 0.43  | -0.63-1.49 | 0.53 | 0.50 |

---
